# Supplementary material
Source: publisher figshare collection journal article supplement (https://acs.figshare.com/ndownloader/files/5128567)
Supplement: Supplementary file 1 [file 5128567]

# **Enzyme kinetics in acoustically levitated droplets of supercooled water: a novel approach to cryoenzymology**

*David D. Weis<sup>\*†</sup> and Jonathan D. Nardozi<sup>‡</sup>*

Department of Chemistry, Skidmore College

815 North Broadway, Saratoga Springs, NY 12866-1632

<sup>\*</sup>Corresponding author.

<sup>†</sup>Present address: Department of Chemistry, MSC03 2060, 1 University of New Mexico, Albuquerque, NM 87131-0001, dweis@unm.edu, (505) 277-2902 (fax).

<sup>‡</sup>Present address: Department of Biochemistry and Molecular Biology, SUNY Upstate Medical University, Syracuse, NY 13210.

**ABSTRACT** A two-wavelength method to separate individual fluorescence emission intensities in a two-component mixture when the emission spectra overlap is derived.

### Supporting Information

Since the emission by the substrate, MUP, overlaps with emission by the product, coumarin 4, the MUP emission must be subtracted from the emission at the coumarin 4 wavelength. The emission by the resorufin internal standard did not overlap with either MUP or coumarin 4. Let  $\lambda_M$ ,  $\lambda_c$ , and  $\lambda_r$ , represent the emission wavelengths for MUP, coumarin 4, and resorufin, respectively, and let  $E$ , with the appropriate subscript, represent the fluorescence emission intensity at these wavelengths. Since the resorufin emission is well-resolved from MUP and coumarin 4, we may assume that the fluorescence emission intensity at the MUP and coumarin 4 emission wavelengths is the sum of emission by the two components

$$E_{\lambda_M} = E_{\lambda_M}^{(M)} + E_{\lambda_M}^{(c)}$$

$$E_{\lambda_c} = E_{\lambda_c}^{(M)} + E_{\lambda_c}^{(c)}$$

where the superscripts (M) and (c) denote emission by MUP and coumarin 4 components of the mixture, respectively. Since the emission measurements were internally standardized by dividing them by the resorufin emission intensity ( $E_{\lambda_r}$ ), these equations become

$$\frac{E_{\lambda_M}}{E_{\lambda_r}} = \frac{E_{\lambda_M}^{(M)}}{E_{\lambda_r}} + \frac{E_{\lambda_M}^{(c)}}{E_{\lambda_r}} \quad (1)$$

$$\frac{E_{\lambda_c}}{E_{\lambda_r}} = \frac{E_{\lambda_c}^{(M)}}{E_{\lambda_r}} + \frac{E_{\lambda_c}^{(c)}}{E_{\lambda_r}} \quad (2)$$

The quantities of interest are the MUP emission at the MUP wavelength and the coumarin 4 emission at the coumarin 4 wavelength,  $E_{\lambda_M}^{(M)}$  and  $E_{\lambda_c}^{(c)}$ , so equations (1) and (2) can be rearranged to

$$\frac{E_{\lambda_M}^{(M)}}{E_{\lambda_T}} = \frac{E_{\lambda_M}}{E_{\lambda_T}} - \frac{E_{\lambda_M}^{(c)}}{E_{\lambda_T}} \quad (3)$$

$$\frac{E_{\lambda_c}^{(c)}}{E_{\lambda_T}} = \frac{E_{\lambda_c}}{E_{\lambda_T}} - \frac{E_{\lambda_c}^{(M)}}{E_{\lambda_T}} \quad (4)$$

In other words, the emission by MUP at the MUP wavelength equals the total emission minus the emission by coumarin 4 at the MUP wavelength, and the emission by coumarin 4 at the coumarin 4 wavelength equals the total emission minus the emission by MUP at the coumarin 4 wavelength. By collecting the emission spectra of MUP and coumarin 4 standards, we can measure the ratio of shoulder-to-peak emission for both MUP and coumarin 4:

$$k^{(M)} = \frac{E_{\lambda_c}^{(M)}}{E_{\lambda_M}^{(M)}} \text{ and } k^{(c)} = \frac{E_{\lambda_M}^{(c)}}{E_{\lambda_c}^{(c)}}$$

The shoulder-to-peak ratios were found to be constant over the concentration ranges used in this study, so these ratios can be rearranged and substituted into equations (3) and (4) to give

$$\frac{E_{\lambda_M}^{(M)}}{E_{\lambda_T}} = \frac{E_{\lambda_M}}{E_{\lambda_T}} - k^{(c)} \frac{E_{\lambda_c}^{(c)}}{E_{\lambda_T}} \quad (5)$$

$$\frac{E_{\lambda_c}^{(c)}}{E_{\lambda_T}} = \frac{E_{\lambda_c}}{E_{\lambda_T}} - k^{(M)} \frac{E_{\lambda_M}^{(M)}}{E_{\lambda_T}} \quad (6)$$

Substitution of equation (5) into equation (6) followed by rearrangement gives

$$\frac{E_{\lambda_c}^{(c)}}{E_{\lambda_T}} = \frac{E_{\lambda_c}}{E_{\lambda_T}} - \frac{k^{(M)}}{(1 - k^{(M)}k^{(c)})} \left( \frac{E_{\lambda_M}}{E_{\lambda_T}} \right) \quad (7)$$

The left-hand side of (7) is the internally standardized emission by only the coumarin 4 at the coumarin 4 emission wavelength (*i.e.*, the signal of interest). The right-hand side of (7) contains observed internally-standardized fluorescence emission at the coumarin 4 and MUP wavelengths and the measured shoulder-to-peak ratios for the two individual components of the mixture obtained by measurement of standards.
